# Supplementary material for: High-speed feature extraction with integrated microwave neurons
Source: Research Square preprint supplement (doi:10.21203/rs.3.rs-8356393/v1), 2026-01-09
Supplement: Supplementary file 2 [file 75735948c8eb74ded093eaee.pdf]

**a.**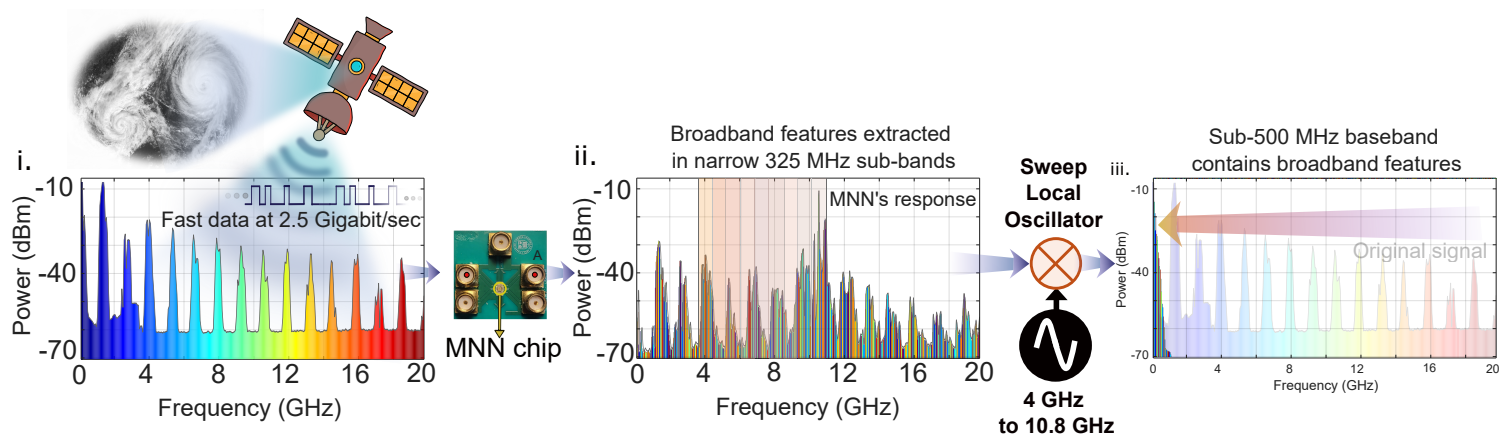**b.**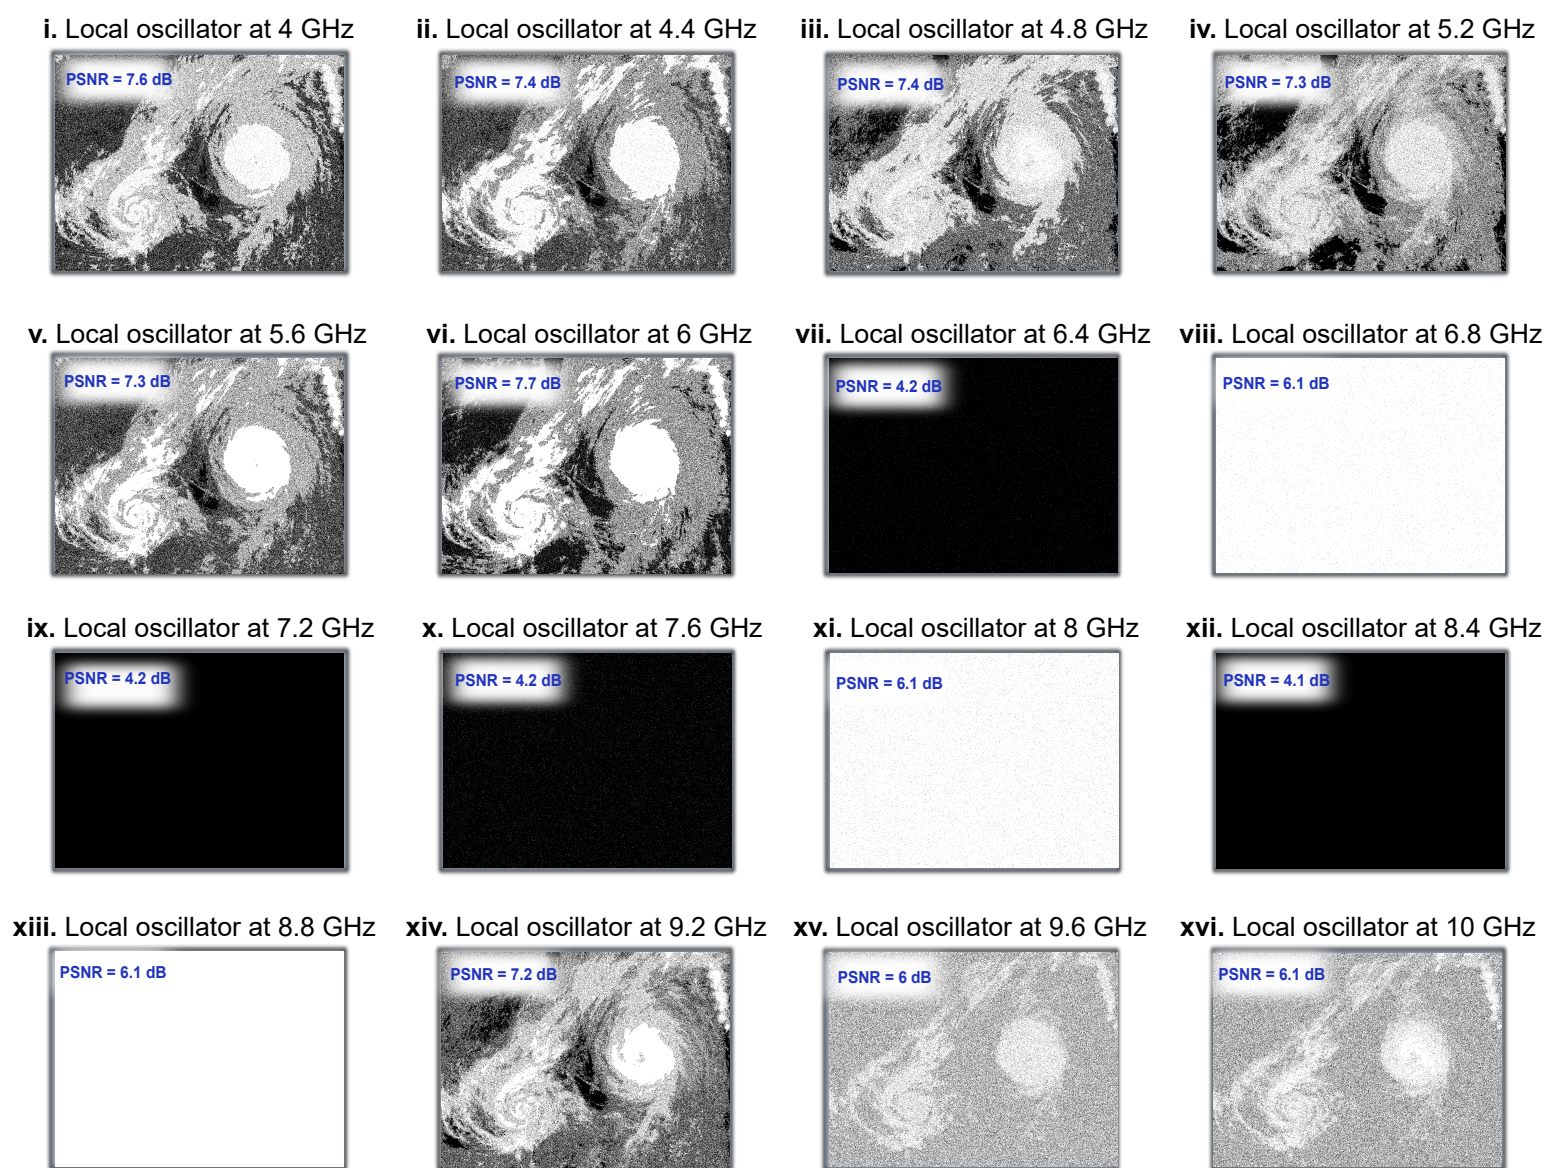**c.**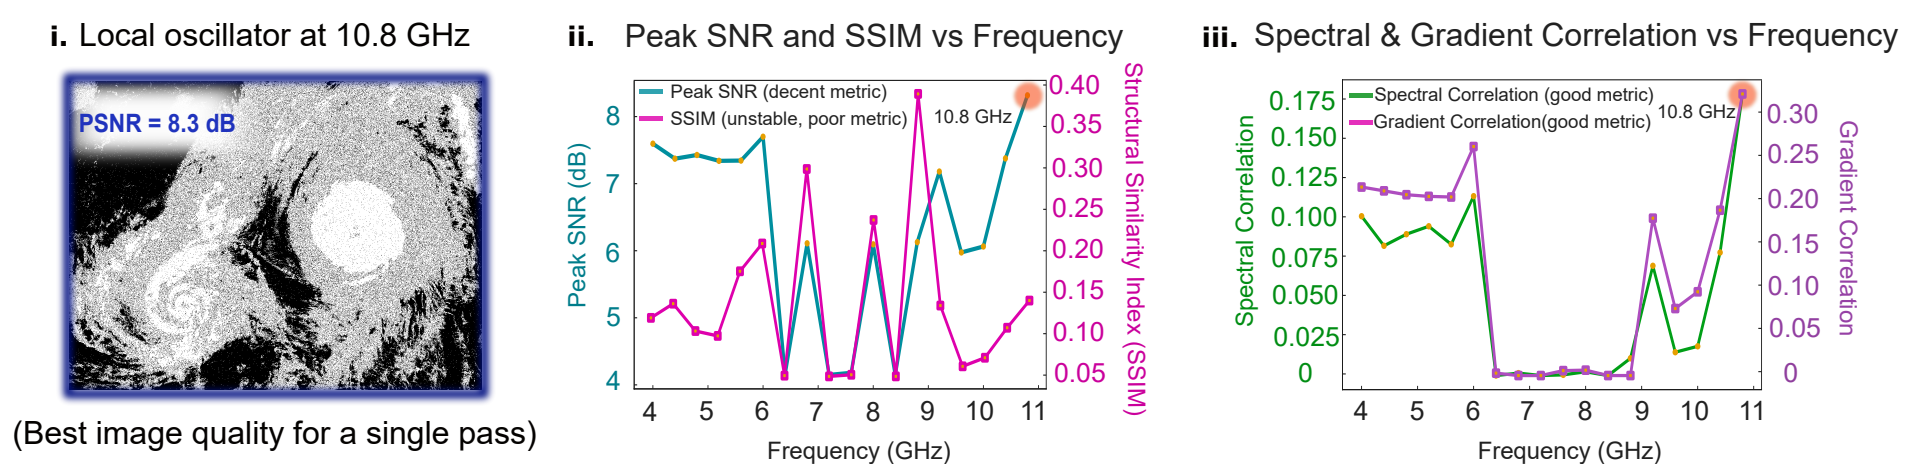

### Extended Data Figure 4. LO-dependent reconstruction quality using the proposed p-bit generation scheme in Figures 5 and 6.

**a**, Fast 8-bit pixel data at 2.5 Gb/s is directly injected into the MNN waveguides, generating a broadband frequency-comb response. A narrow 325 MHz baseband sub-band is selected using a tunable local oscillator (LO). We seek to determine how much information each output sub-band retains from the original broadband input, since the MNN redistributes signal content across its wide instantaneous comb-like spectrum. **b**, Representative single-shot reconstructions obtained using p-bits for different LO values. Each image is annotated with its peak signal-to-noise ratio (PSNR). Certain LO frequencies exhibit strong Static-Ratio diversity in the p-bit output, producing effective dithering and clearer structural features, while others show weak spectral diversity and yield washed-out images. **c**, Image quality across LO settings is quantified using four metrics. **c.i**, PSNR indicates pixel-wise fidelity and is maximized near LO = 10.8 GHz, corresponding to the perceptually best reconstruction in this sweep. **c.ii**, Due to the Gaussian noise-like texture present in the reconstructed images, SSIM, being driven primarily by local contrast, underestimates their perceptual similarity to ground truth. **c.iii**, In contrast, spectral correlation (similarity in Fourier magnitude) and gradient-magnitude correlation (similarity in edges and contours) more faithfully track the perceptual quality of the MNN-enabled dithering-based reconstruction, correctly identifying the LO  $\approx$  10.8 GHz band as optimal.
