# Supplementary material for: High-speed feature extraction with integrated microwave neurons
Source: Research Square preprint supplement (doi:10.21203/rs.3.rs-8356393/v1), 2026-01-09

**a.** i. MNN configuration for token-encoded parametric oscillations

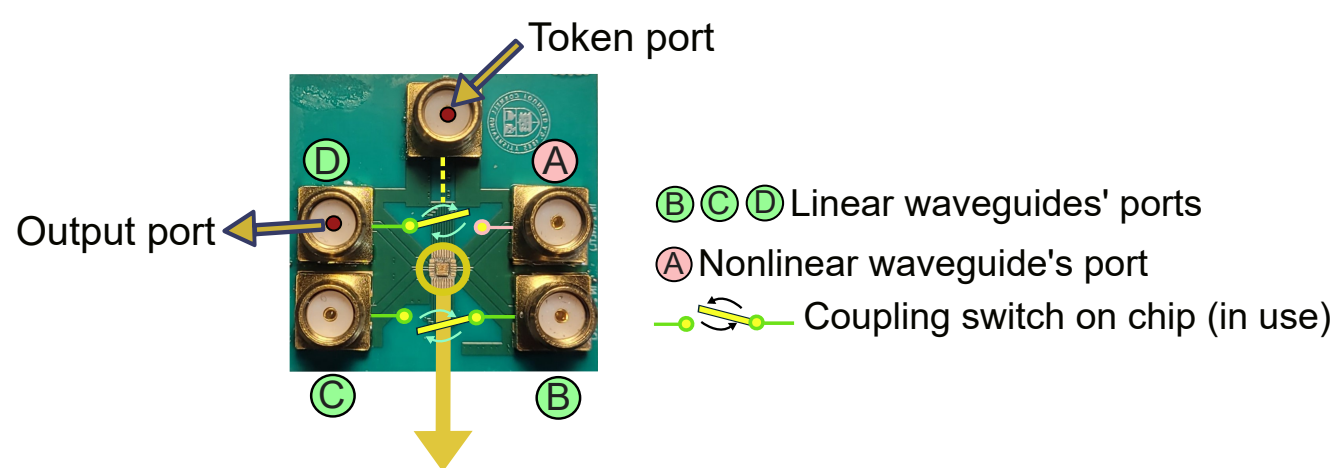

ii. Integrated circuit model for token-encoded parametric oscillations

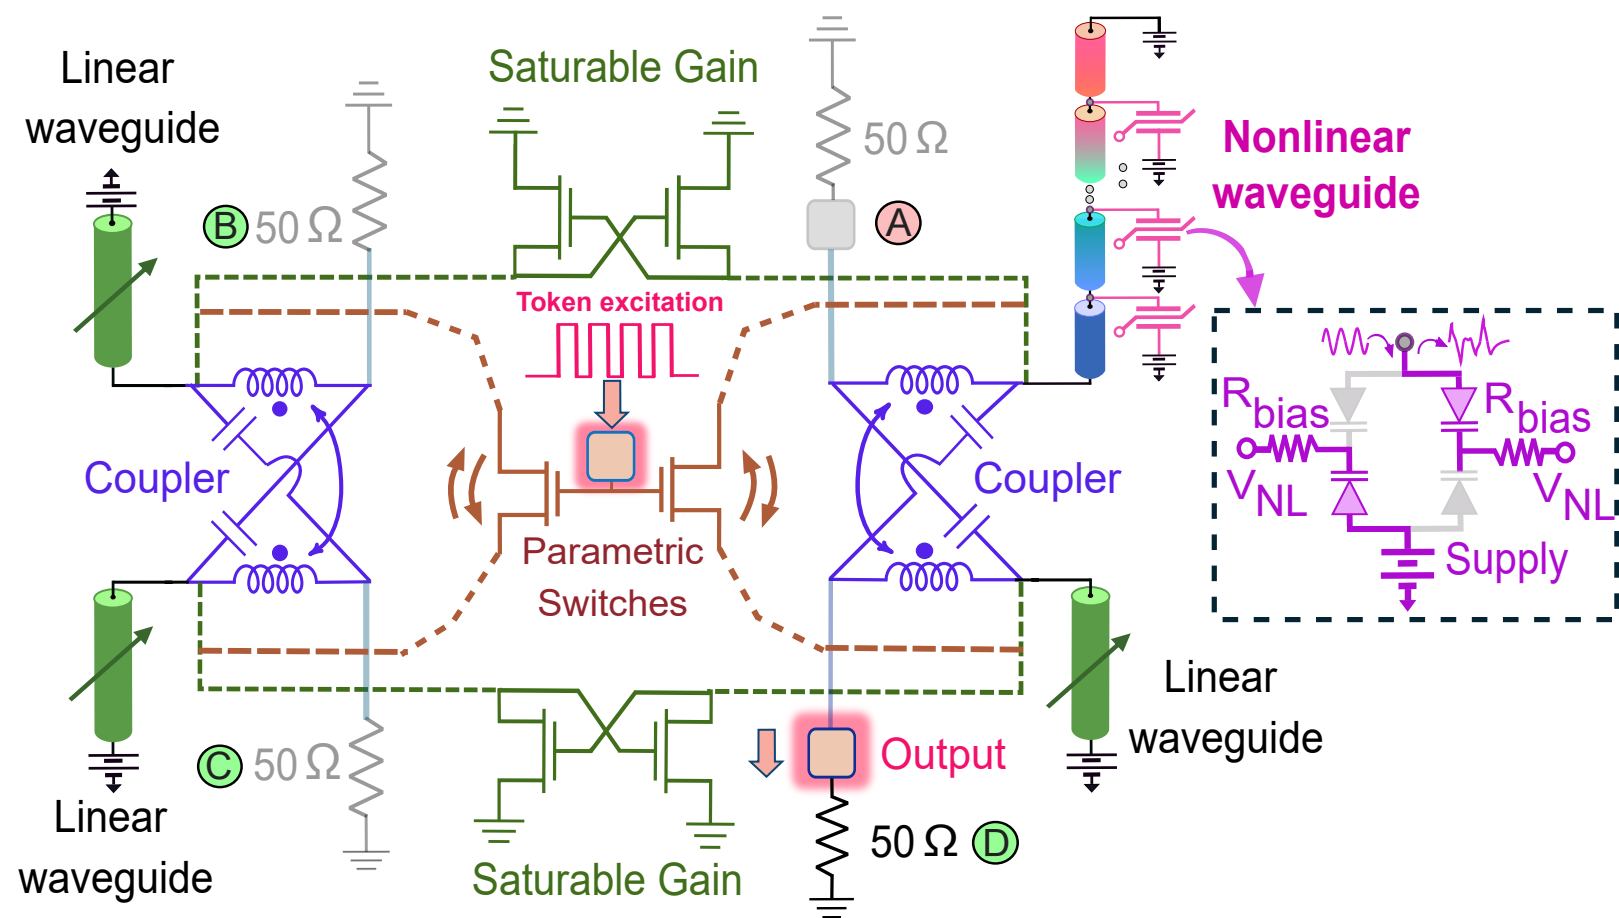

iii. Reduced circuit model for token-encoded parametric oscillations

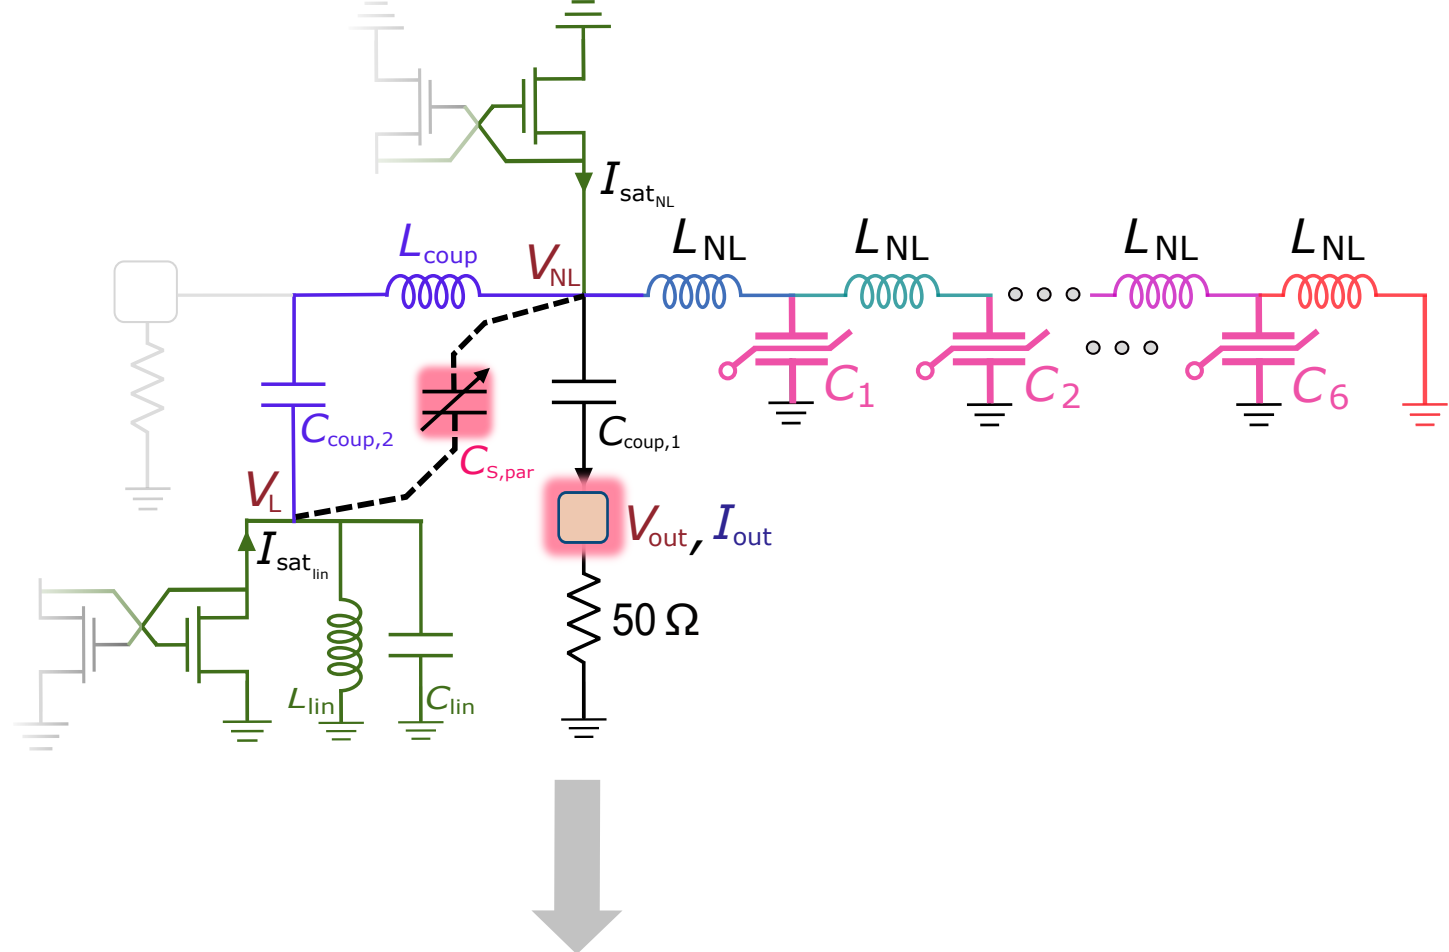

**c.**

i. Reduced coupled-mode model for token-encoded parametric oscillations

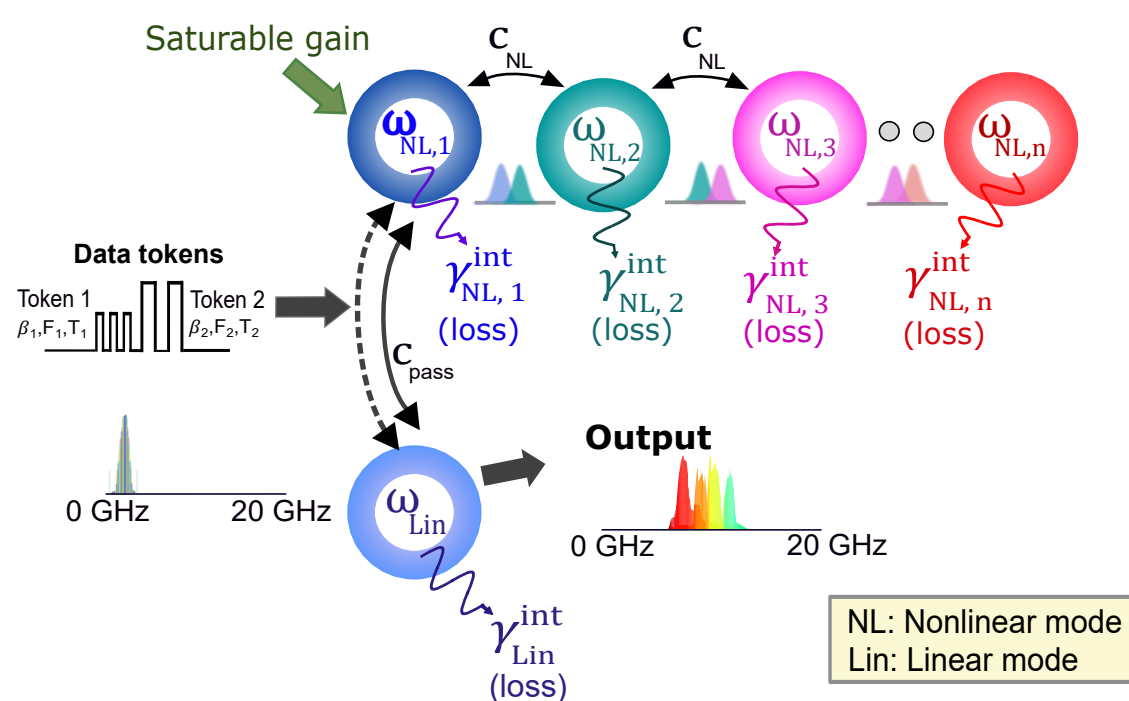

**d.** Coupled-mode simulations of steady-state spectra of token-encoded oscillations

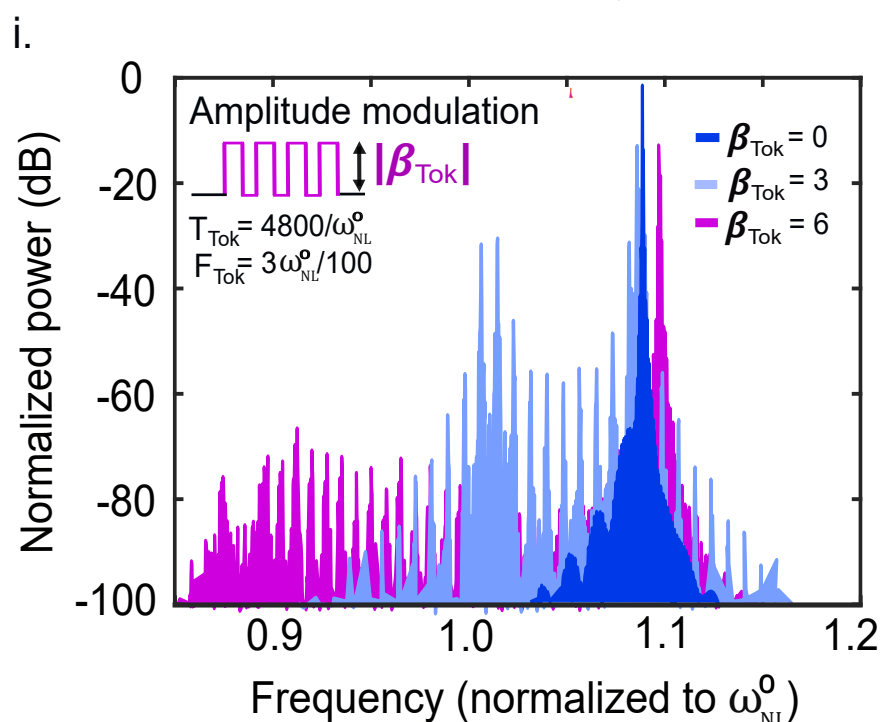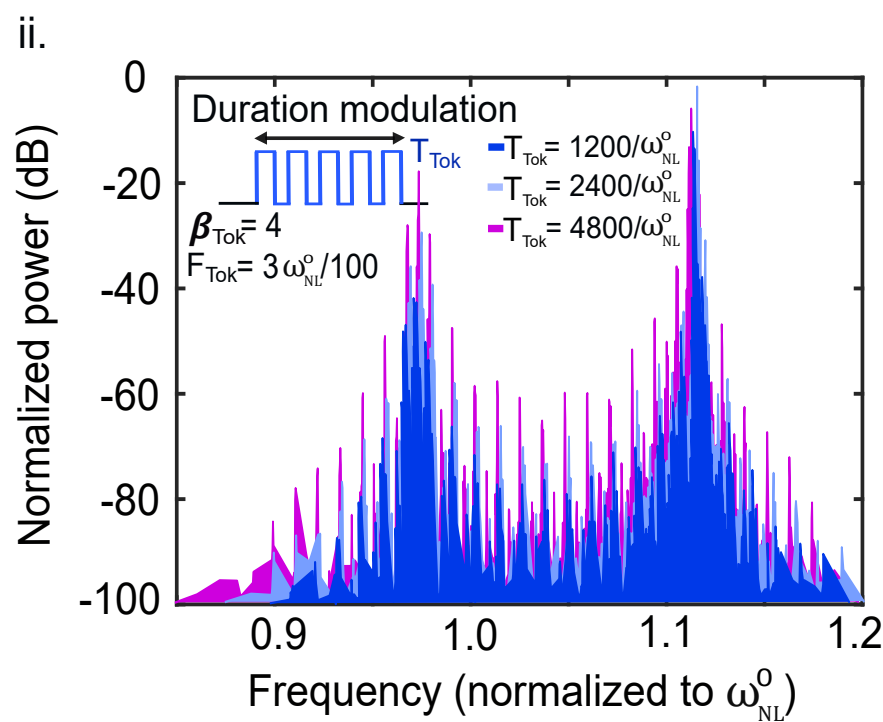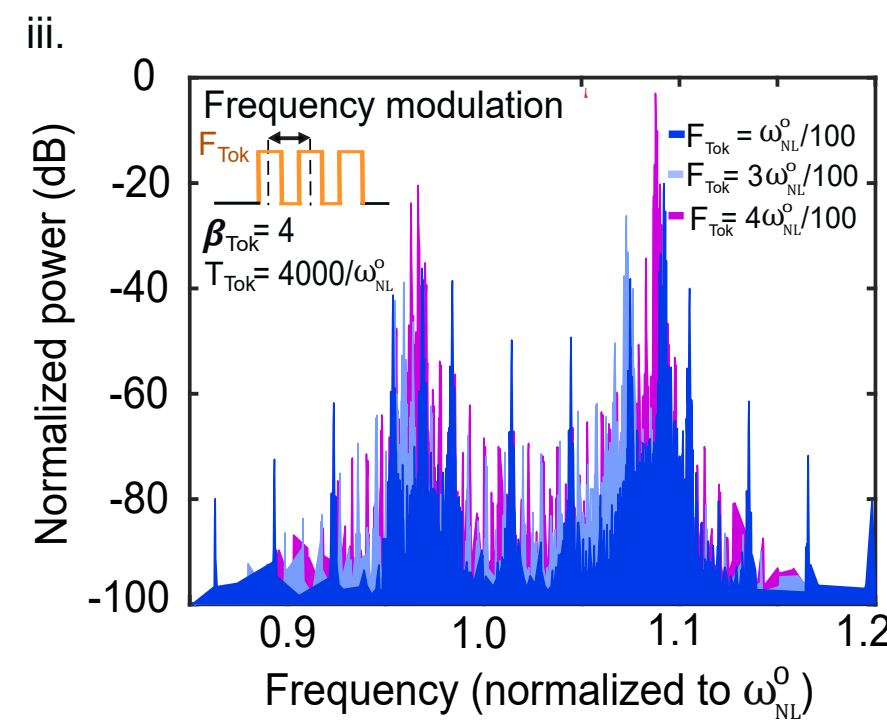

**b.** i. MNN configuration for broadband-input-driven oscillations

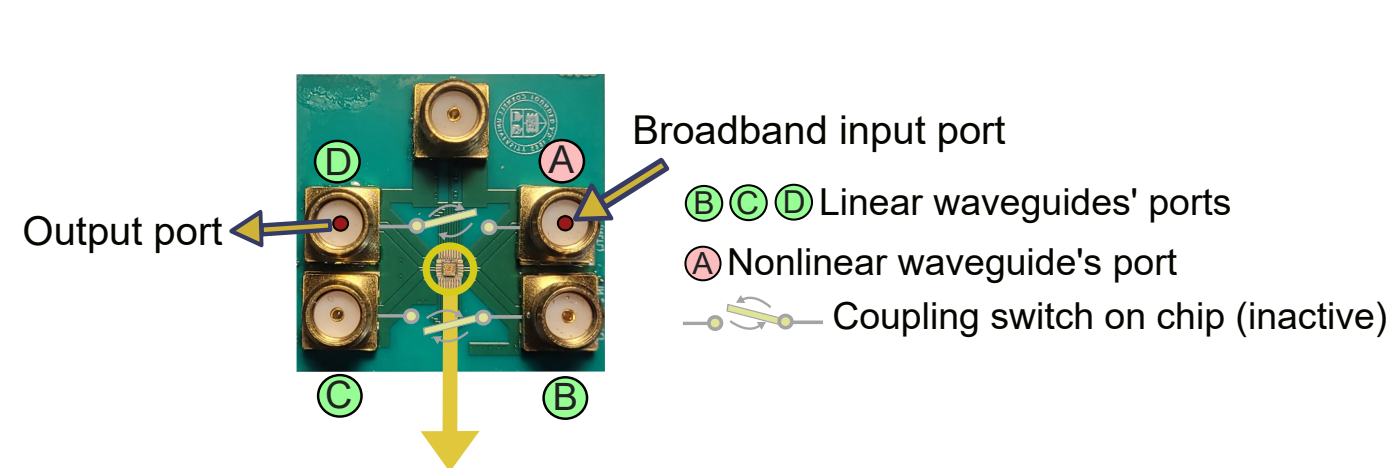

ii. Integrated circuit model for broadband-input-driven oscillations

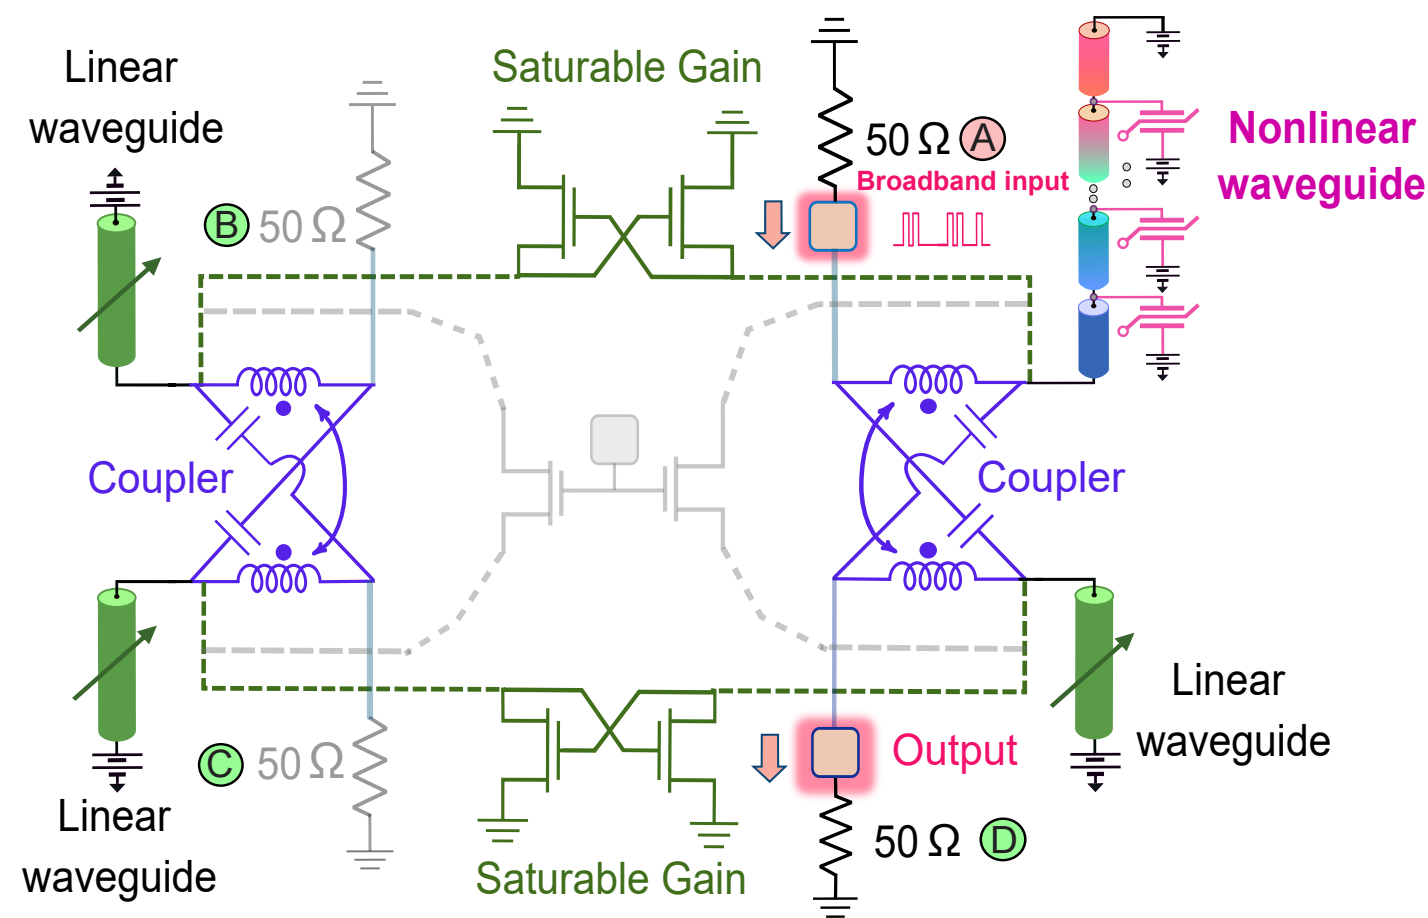

iii. Reduced circuit model for broadband-input-driven oscillations

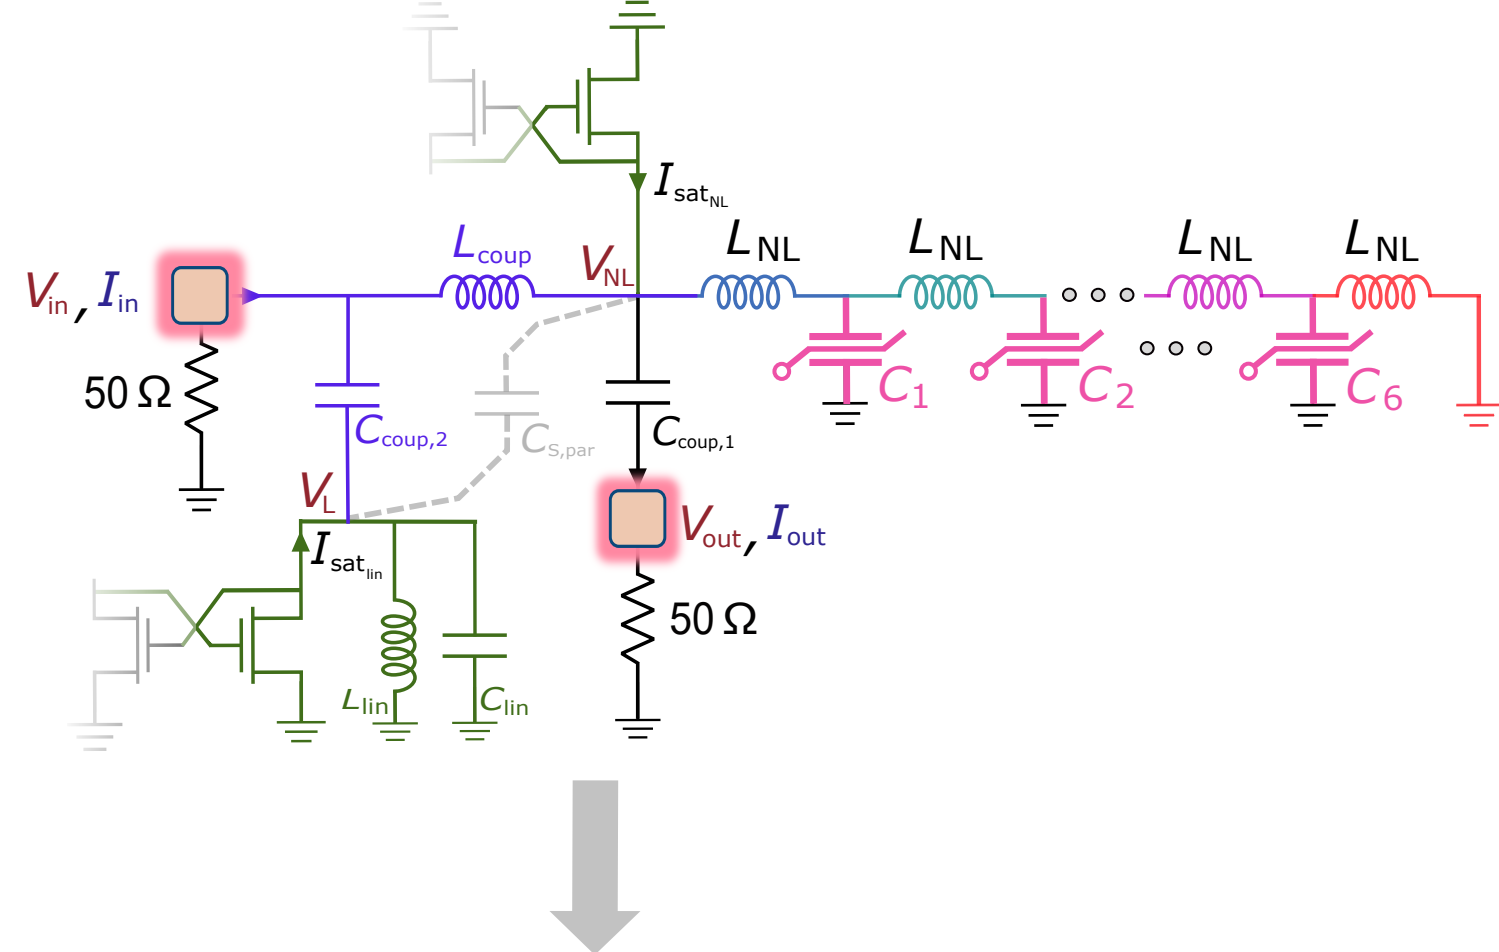

ii. Reduced coupled-mode model for broadband-input-driven oscillations

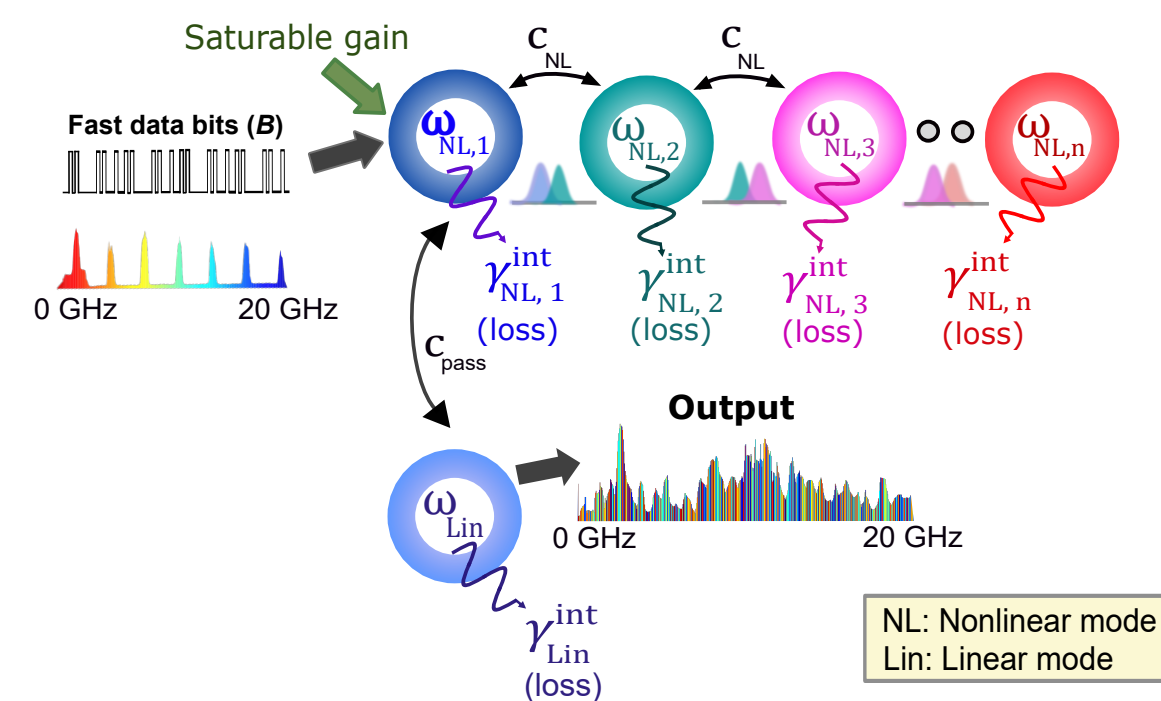

Supplement: Supplementary file 3 [file 7b5aabedfa14bdd9e2d1b6ea.pdf]
