# Supplementary material for: High-speed feature extraction with integrated microwave neurons
Source: Research Square preprint supplement (doi:10.21203/rs.3.rs-8356393/v1), 2026-01-09
Supplement: Supplementary file 4 [file 979189f8ced9a163872eaf10.pdf]

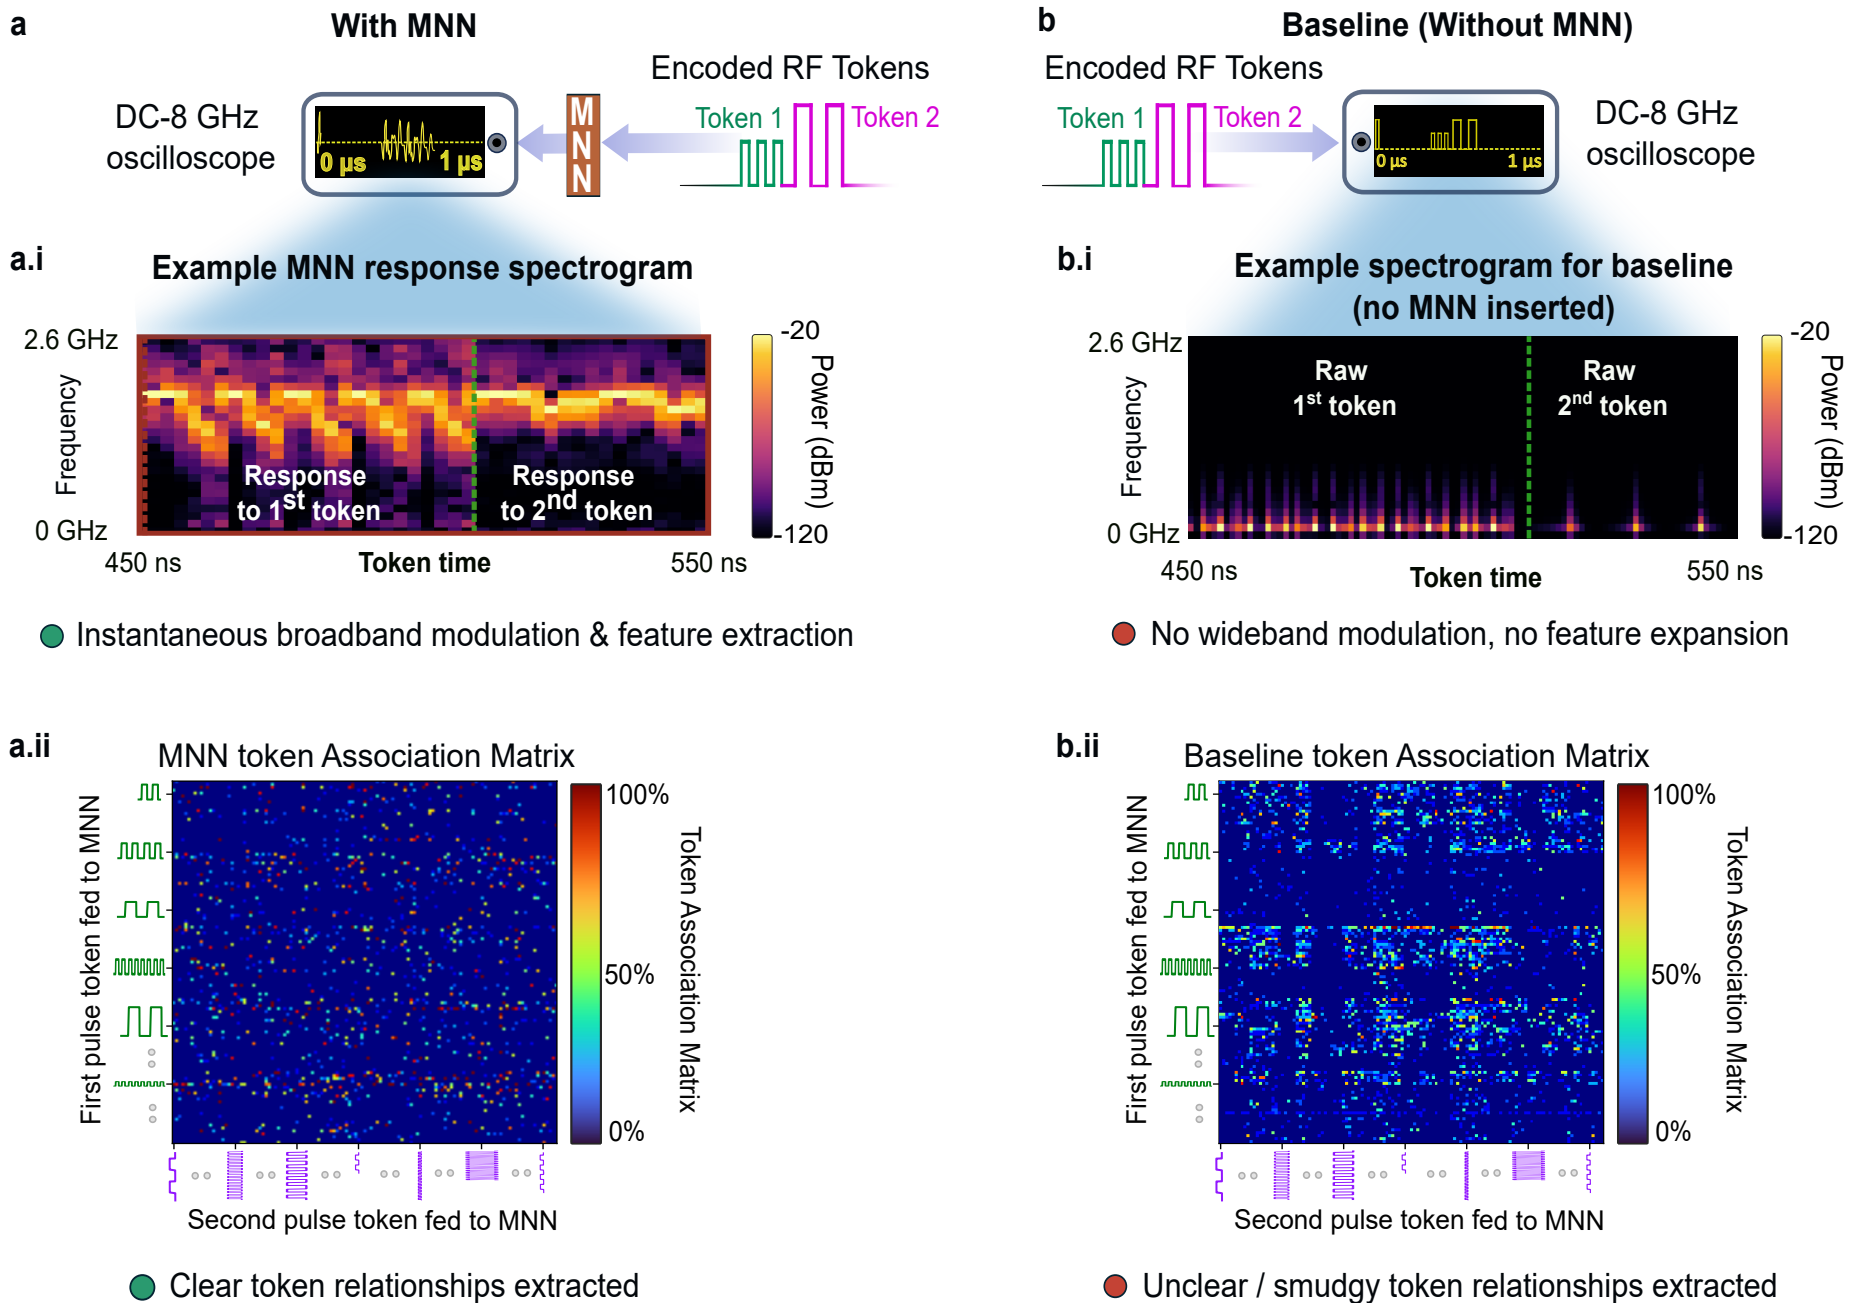

**Extended Data Figure 3. Effect of MNN-based feature expansion on token relationships.** **a**, RF pulse-train tokens are injected into the MNN, whose nonlinear dynamics expand each token's spectrum over several gigahertz (followed by mixer-based downconversion to baseband for measurement; circuitry not shown). **a.i**, Example spectrogram showing that different tokens generate distinct broadband signatures within a  $\sim 100$  ns window. **a.ii**, Token Association Matrix derived from a linear classifier applied to these spectrograms, revealing clear and separable token-to-token relationships. **b**, The same tokens are directly observed using identical measurement bandwidth, without feature expansion. **b.i**, Raw spectrograms remain narrowband and visually similar across different tokens. **b.ii**, The resulting association matrix shows weak, blurred structure, indicating that tokens lack discriminable spectral features without MNN processing.
