# Supplementary material for: High-speed feature extraction with integrated microwave neurons
Source: Research Square preprint supplement (doi:10.21203/rs.3.rs-8356393/v1), 2026-01-09
Supplement: Supplementary file 5 [file b21e318353de5877acd6bb65.pdf]

**a. Reconstruction with MNN vs. reconstruction with digital baseline**

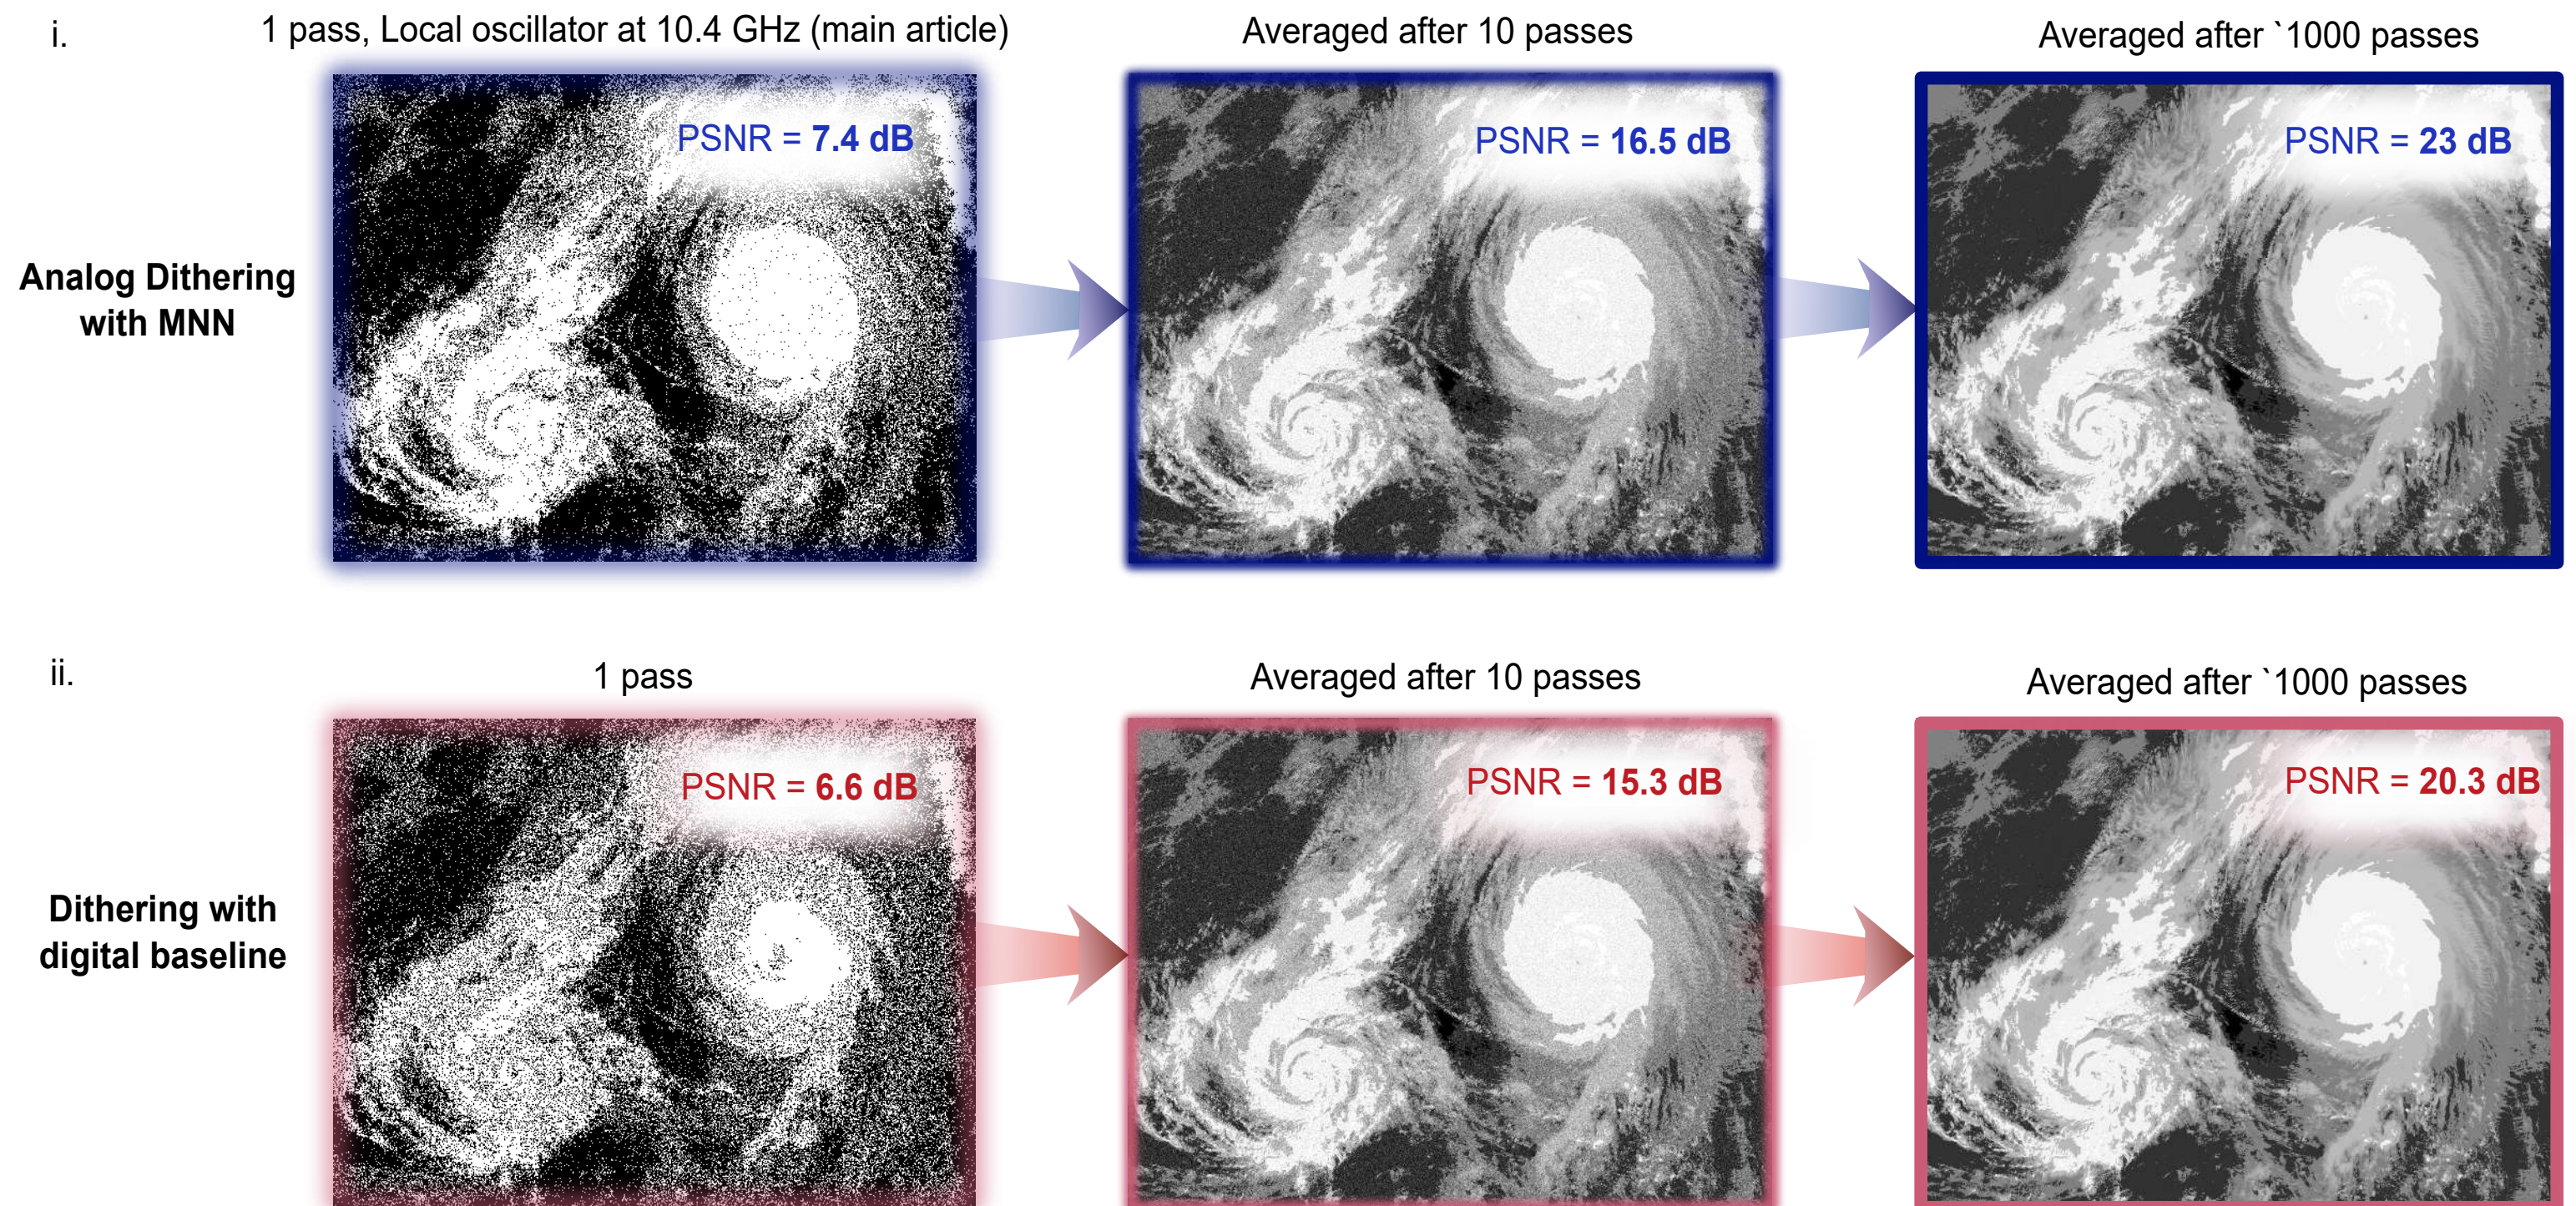

**b. PSNR vs number of passes of the same image**

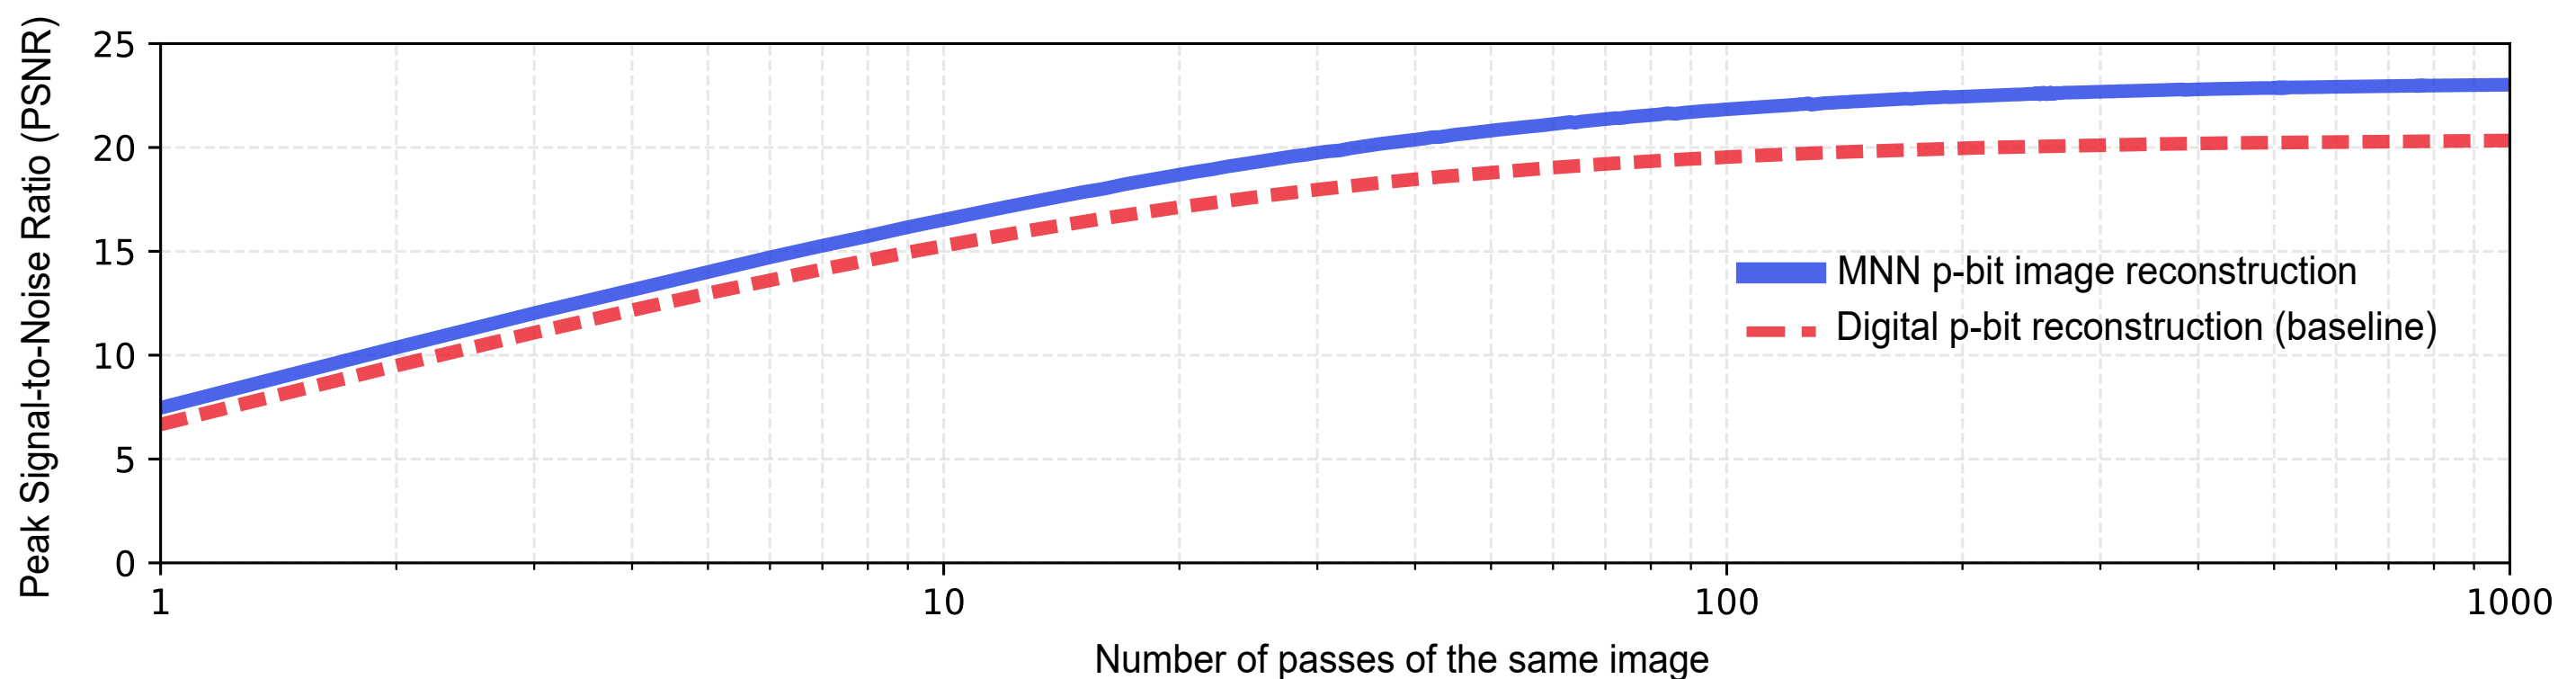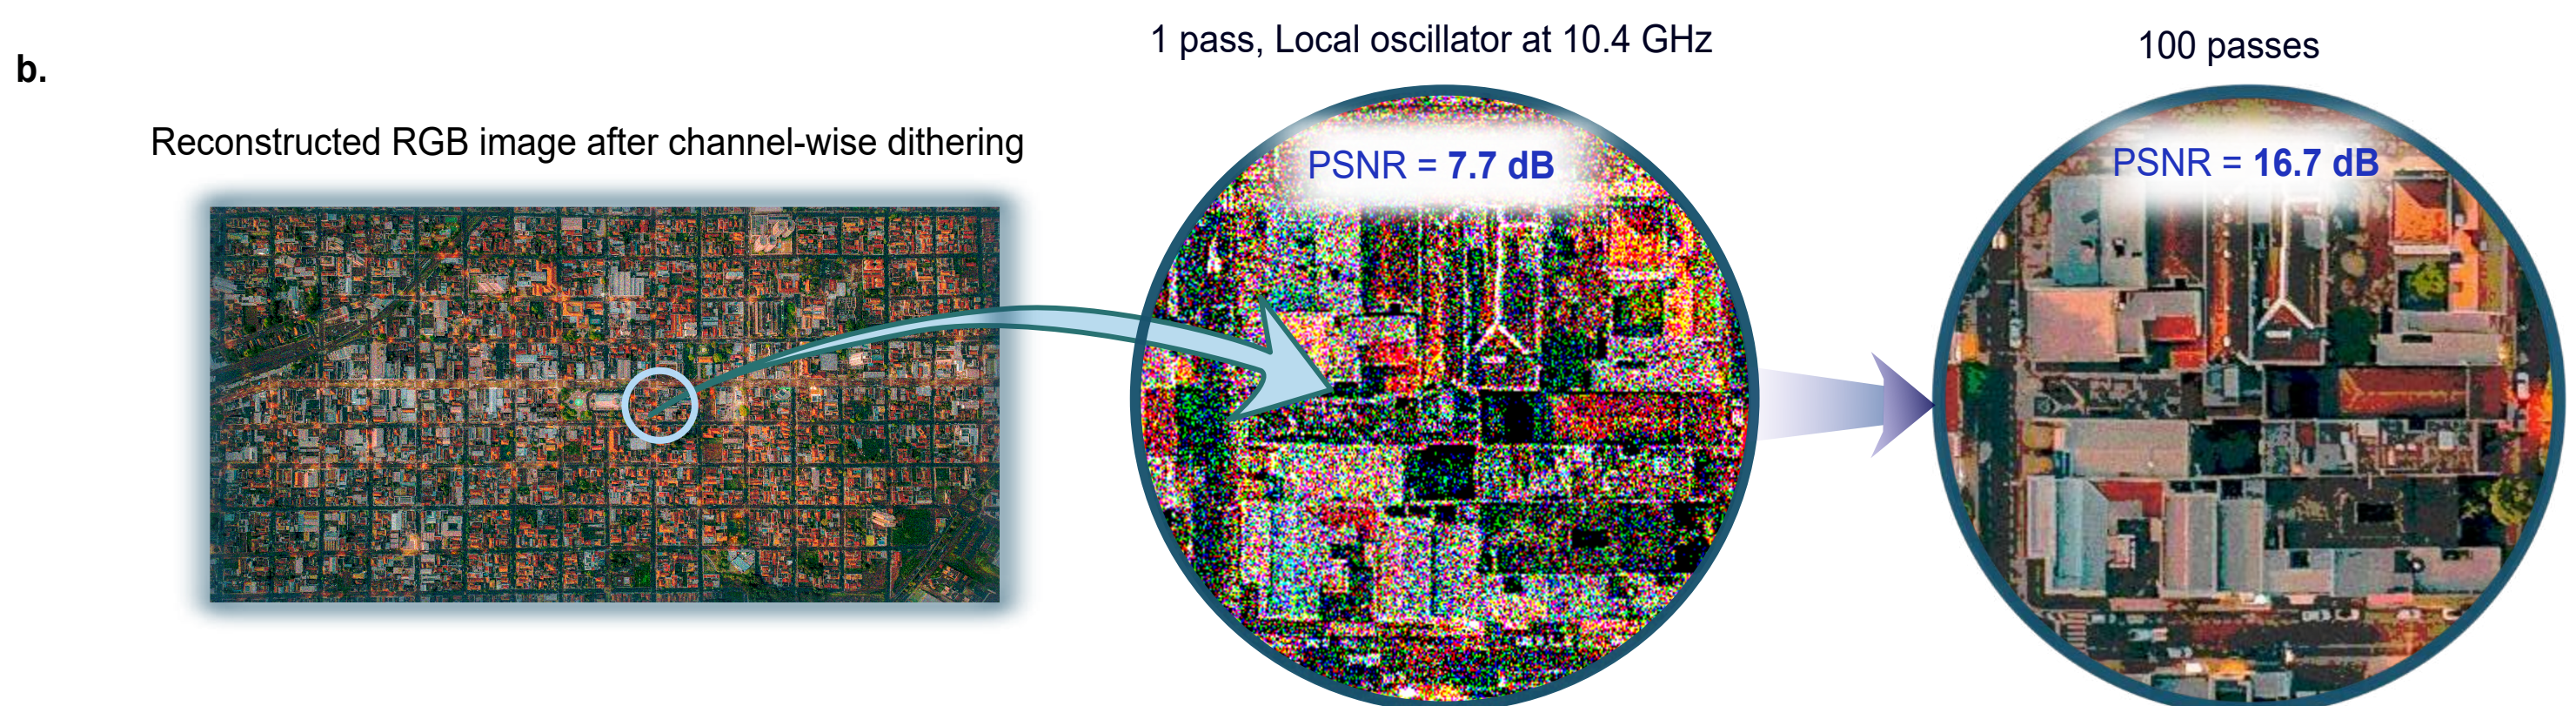

**Extended Data Fig 5. Reconstruction improves over repeated MNN passes by averaging probabilistic bits generated using the method in Fig. 5. a,** The Peak Signal-to-Noise Ratio (PSNR) rises as more dithered MNN reconstructions are accumulated and the pixel intensities are averaged across repeated passes (**a.i**). Averaging over 1, 10, and 1000 passes demonstrates the expected  $\sqrt{N}$  improvement associated with Monte-Carlo denoising: repeated stochastic estimates are averaged to suppress noise and recover the underlying image structure (**a.ii**). **b,** High-resolution RGB satellite images are reconstructed by independently processing the Red, Green, and Blue channels. A single pass produces analog-TV-like Gaussian noise, but repeated transmissions (e.g., 100 passes at 2.4 Gbps from a geostationary satellite) provide Monte-Carlo averaging that yields an efficient, high-fidelity reconstruction.
